# Supplementary material for: Spatially-resolved transcriptomics reveal macrophage heterogeneity and prognostic significance in diffuse large B-cell lymphoma
Source: PubMed Central journal article supplement (PMC10923916; doi:10.1038/s41467-024-46220-z), 2024-03-08
Supplement: 41467_2024_46220_MOESM1_ESM.pdf [file 41467_2024_46220_MOESM1_ESM.pdf]

1 **Supplementary Appendix: Spatially-resolved transcriptomics reveal**  
2 **macrophage heterogeneity and prognostic significance in diffuse large**  
3 **B-cell lymphoma**

4 Contents  
5 Investigators .....1  
6 Supplementary Methods .....4  
7 Supplementary Figures .....6  
8 Supplementary Tables .....21  
9 Supplementary References .....26

10  
11  
12 **Investigators**

13 **Authors:** Min Liu<sup>1,2,3</sup>; Giorgio Bertolazzi<sup>4,5</sup>; Shruti Sridhar<sup>1</sup>; Rui Xue Lee<sup>1</sup>; Patrick  
14 Jaynes<sup>1</sup>; Kevin Mulder<sup>6,7,8</sup>; Nicholas Syn<sup>9,10</sup>; Michal Marek Hoppe<sup>1</sup>; Fan Shuangyi<sup>9</sup>;  
15 Yanfen Peng<sup>1</sup>; Jocelyn Thng<sup>1</sup>; Reiya Chua<sup>11</sup>; Jayalakshmi<sup>11</sup>; Yogeshini Batumalai<sup>11</sup>;  
16 Sanjay De Mel<sup>11,12</sup>, Limei Poon<sup>11,12</sup>; Esther Chan<sup>11,12</sup>; Joanne Lee<sup>11,12</sup>; Susan Swee-  
17 Shan Hue<sup>9,12</sup>; Sheng-Tsung Chang<sup>13</sup>; Shih-Sung Chuang<sup>13</sup>; K George Chandy<sup>14</sup>;  
18 Xiaofei Ye<sup>15</sup>; Qiang Pan-Hammarström<sup>16</sup>; Florent Ginhoux<sup>6,7,8</sup>; Yen Lin Chee<sup>11,12</sup>;  
19 Siok-Bian Ng<sup>1,9,12</sup>; Claudio Tripodo<sup>5,17\*</sup>; Anand D. Jeyasekharan<sup>1,11,12,18\*</sup>

20

21

22

1 **Affiliations:**

2 <sup>1</sup>Cancer Science Institute of Singapore, National University of Singapore, Singapore

3 <sup>2</sup>Department of Radiation Oncology, Chongqing University Cancer Hospital,

4 Chongqing, P. R. China

5 <sup>3</sup>Department of Immunology, Tianjin Medical University Cancer Institute and

6 Hospital, Tianjin, P. R. China

7 <sup>4</sup>Department of Economics, Business and Statistics, University of Palermo, Palermo,

8 Italy.

9 <sup>5</sup>Tumor Immunology Unit, Department of Sciences for Health Promotion and Mother-

10 Child Care "G. D'Alessandro", University of Palermo, Palermo, Italy

11 <sup>6</sup>Singapore Immunology Network, Agency for Science, Technology and Research,

12 Singapore

13 <sup>7</sup>Institut National de la Santé Et de la Recherche Medicale (INSERM) U1015, Equipe

14 Labellisée—Ligue Nationale contre le Cancer, 94800 Villejuif, France

15 <sup>8</sup>Université Paris-Saclay, Gustave Roussy, Villejuif, France

16 <sup>9</sup>Department of Pathology, Yong Loo Lin School of Medicine, National University of

17 Singapore, Singapore

18 <sup>10</sup>Department of Biomedical Informatics, Yong Loo Lin School of Medicine, National

19 University of Singapore, Singapore

1 <sup>11</sup>Department of Haematology-Oncology, National University Health System,

2 Singapore

3 <sup>12</sup>NUS Centre for Cancer Research, Yong Loo Lin School of Medicine, National

4 University of Singapore, Singapore

5 <sup>13</sup>Department of Pathology, Chi-Mei Medical Center, Tainan City, Taiwan

6 <sup>14</sup>Lee Kong Chian School of Medicine, Nanyang Technological University Singapore,

7 Singapore

8 <sup>15</sup>Kindstar Global Precision Medicine Institute, Wuhan, China

9 <sup>16</sup>Division of Immunology, Department of Medical Biochemistry and Biophysics,

10 Karolinska Institutet, Stockholm, Sweden

11 <sup>17</sup> Histopathology Unit, Institute of Molecular Oncology Foundation (IFOM) ETS - The

12 AIRC Institute of Molecular Oncology, Milan, Italy

13 <sup>18</sup>Department of Medicine, Yong Loo Lin School of Medicine, National University of

14 Singapore, Singapore

15

16

17

18

19

## 1 **Supplementary Methods**

### 2 **Immunofluorescence staining**

3 The formalin-fixed paraffin-embedded sections (3  $\mu\text{m}$  thick) from CMMC DLBCL  
4 cohort ( $n = 86$ ) were baked at  $60^\circ\text{C}$  for 20 min, and loaded into the slide tray on Bond  
5 Max (Leica Biosystems) for deparaffinization, rehydration, antigen retrieval.  
6 Subsequently, the slides were incubated with primary antibody (C1Q antibody,  
7 Ab268120, Abcam, Cambridge, UK) for 20 min, incubated with anti-mouse IgG HRP  
8 secondary antibody for 10 min, and incubated Opal TSA staining for 5 min, followed  
9 by a full cycle starting from antigen retrieval to stain with another primary antibody  
10 (CD68 antibody, M0876, Dako, California, USA). Finally, slides were mounted with  
11 DAPI and mounting medium. Images were acquired using the Vectra 2 imager and  
12 analysed using inForm 2.6.0 (Akoya Biosciences, Massachusetts, USA). Cells were  
13 segmented with DAPI nuclear staining. The mean membrane intensity and mean  
14 cytoplasm intensity per cell were captured for CD68 and C1Q, respectively. For each  
15 image, cells were deemed as positive (phenotyped) for CD68 through an algorithm  
16 within inForm, based on factors such as localized background signals and morphology.  
17 As C1Q shows a wide range of expression levels within CD68 cells, no specific cut-off  
18 for positivity could be assigned. Therefore, for each patient, the mean pixel intensity of  
19 C1Q per CD68+ cell was measured, and the cohort was divided across the median to  
20 compare C1Q high vs low cases. Based on this score, a Kaplan-Meier analysis was  
21 performed to estimate the survival association between high and low groups, stratified  
22 by the median intensity of C1Q in CD68+ cells. The log-rank test was used to test the

1 differences in the OS between these two groups.

1 Supplementary Figures

2 Supplementary Fig. 1

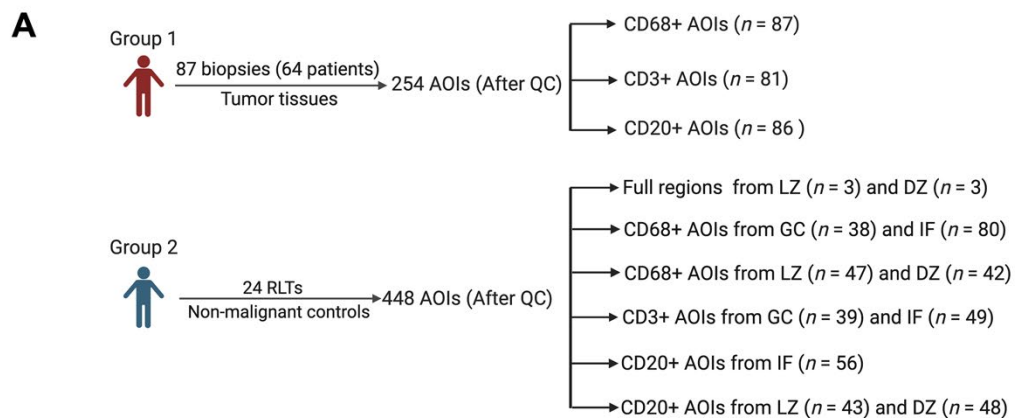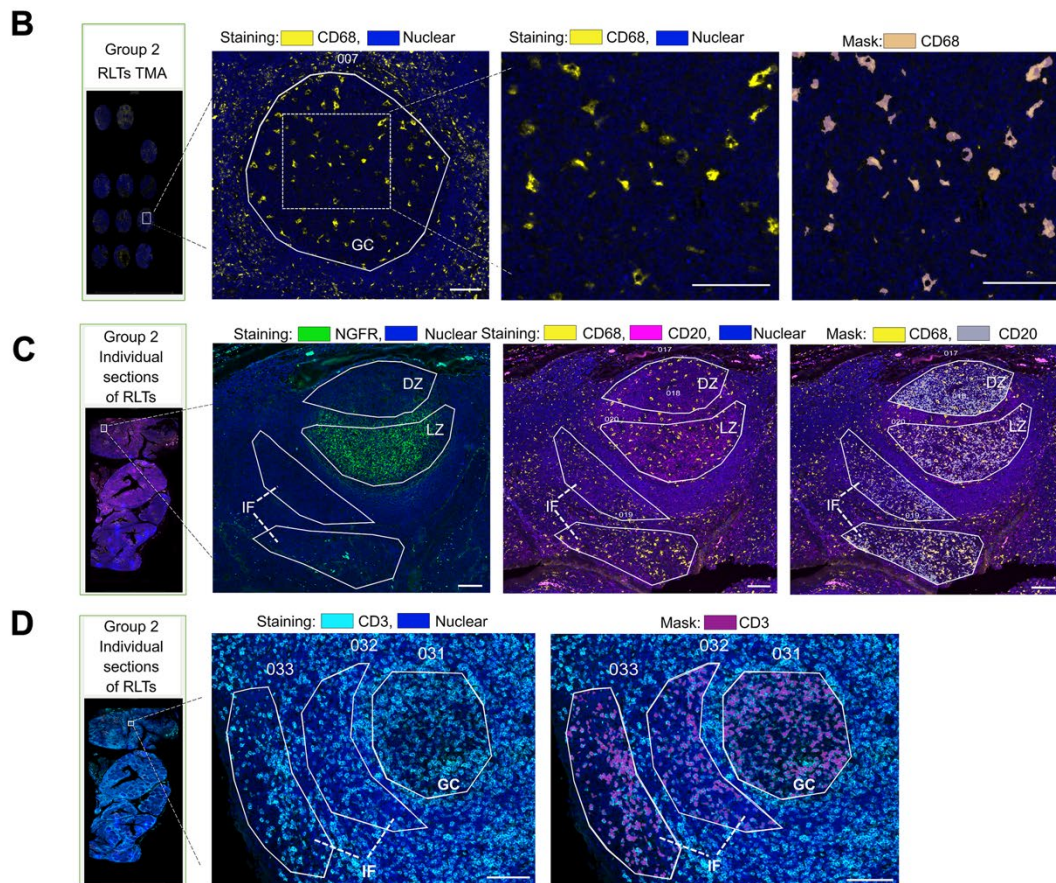

3

4

1 **Supplementary Fig. 1. DSP ROI collection summary on the study population, and**  
2 **immunofluorescence staining in different types of segmentation. (A)** Schematic of  
3 the study population and the corresponding numbers of DSP AOIs collected (created  
4 with BioRender.com). **(B)** For the RLT TMA, CD68 and SYTO 13 were used to  
5 respectively stain macrophages (yellow) and nuclei (blue). GC macrophages were  
6 collected based on the staining masks generated on GeoMx. Source data are provided  
7 as a Source Data file. **(C)** For DSP of individual tonsil sections, serial sections were  
8 used. To distinguish the regions of the GC, the first section was stained with NGFR to  
9 illuminate the LZ (green). The subsequent section was stained with macrophages were  
10 stained with CD68 (yellow) , B cells were stained with CD20 (magenta) and nuclei  
11 were stained with SYTO 13 (blue). Macrophages and B cells of LZ, DZ, and IF were  
12 collected respectively based on their corresponding staining masks. Source data are  
13 provided as a Source Data file. **(D)** CD3 stained T cells (cyan), and SYTO 13 stained  
14 nuclei (blue). T cells of GC and IF were collected based on the staining masks of CD3.  
15 Representative images were shown. Scale bar: 100  $\mu$ m. Source data are provided as a  
16 Source Data file. Digital spatial profiling, DSP; reactive lymphoid tissue, RLT; tissue  
17 microarray, TMA; regions of interest, ROI; areas of interest, AOI; nerve growth factor  
18 receptor, NGFR; light zone, LZ; dark zone, DZ; interfollicular, IF, germinal center, GC.  
19  
20  
21

1 Supplementary Fig. 2

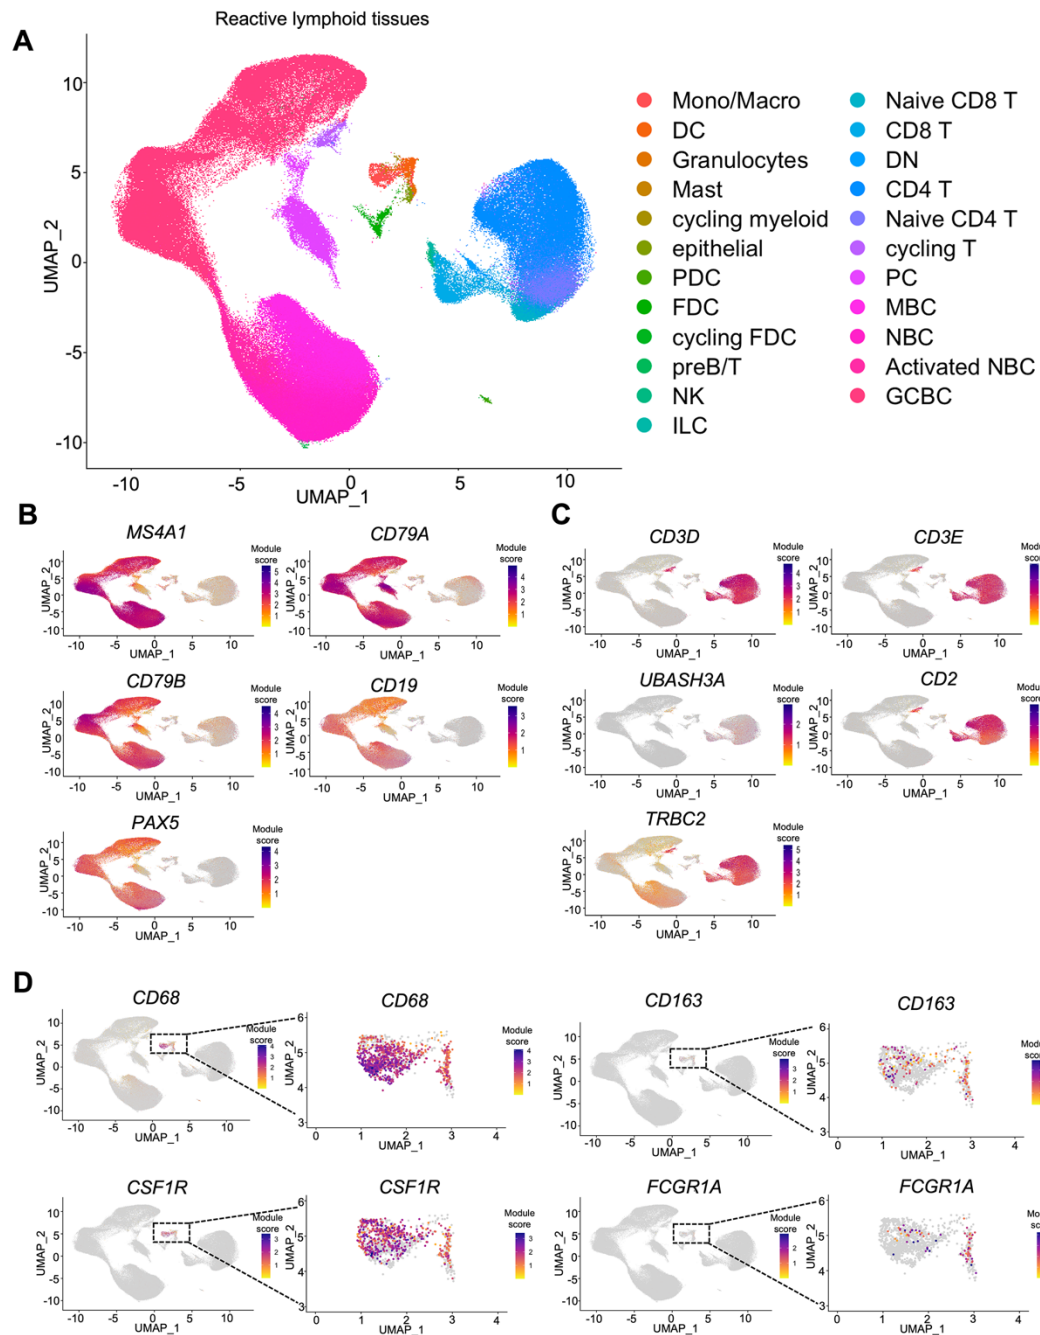

2

3

4

5



1 **Supplementary Fig. 2. Signature validation of B cells, T cells, and macrophages on**  
2 **scRNA-seq datasets of RLTs. (A)** UMAP of the HCA tonsil dataset containing an  
3 integrative single cell atlas of over 209,786 cells, with a glossary of annotated cell types.  
4 **(B-D)** Expression of individual genes representing B cells (*MS4A1*, *CD79A*, *CD79B*,  
5 *CD19*, and *PAX5*), T cells (*CD3D*, *CD3E*, *UBASH3A*, *CD2*, and *TRBC2*), and  
6 macrophages (*CD68*, *CD163*, *CSF1R*, and *FCGR1A*) were projected onto the scRNA-  
7 seq atlas to assess enrichment. Single cell sequencing, scRNA-seq; Uniform Manifold  
8 Approximation and Projection, UMAP; activated naive B cells, NBC; GC B cells,  
9 GCBC; plasma cells, PC; memory B cells, MBC; Double negative T cells, DN; Innate  
10 Lymphoid cells, ILC; Natural Killer cells, NK; Precursor B/T cells, pre B/T; follicular  
11 dendritic cells, FDC; Monocytes/Macrophages, Mono/Macro.

12

13

14

15

16

17

18

19

20

21

22

1 **Supplementary Fig. 3**

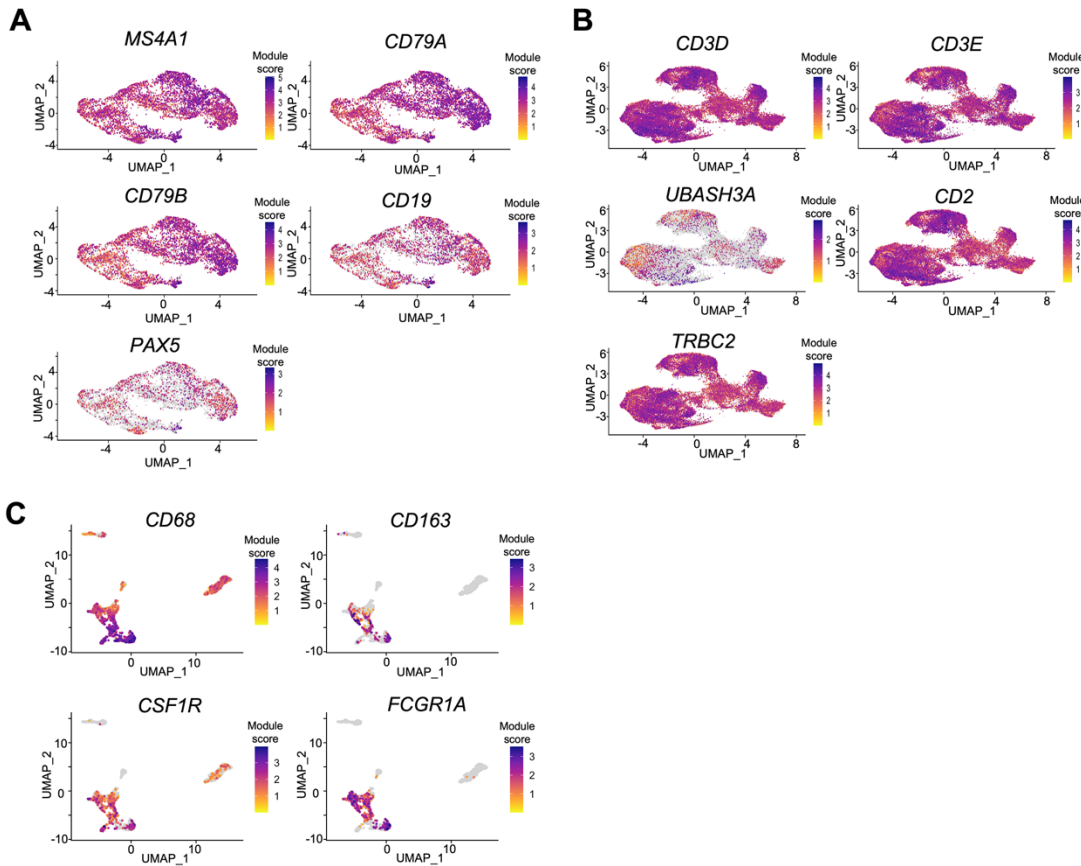

2

3 **Supplementary Fig. 3. Signature validation of B cells, T cells, and macrophages on**

4 **scRNA-seq datasets of DLBCL tissues. (A-C)** From the scRNA-seq dataset of

5 DLBCL produced by Ye et al, expression of individual genes representing B cells

6 (*MS4A1*, *CD79A*, *CD79B*, *CD19*, and *PAX5*), T cells (*CD3D*, *CD3E*, *UBASH3A*, *CD2*,

7 and *TRBC2*), and macrophages (*CD68*, *CD163*, *CSF1R*, and *FCGR1A*) were projected

8 onto the scRNA-seq atlas to assess enrichment. Original UMAPs with annotations for

9 non-malignant B-cells, T-cells and myeloid cells can be found in Ye et al <sup>1</sup>.

10

11

1 **Supplementary Fig. 4**

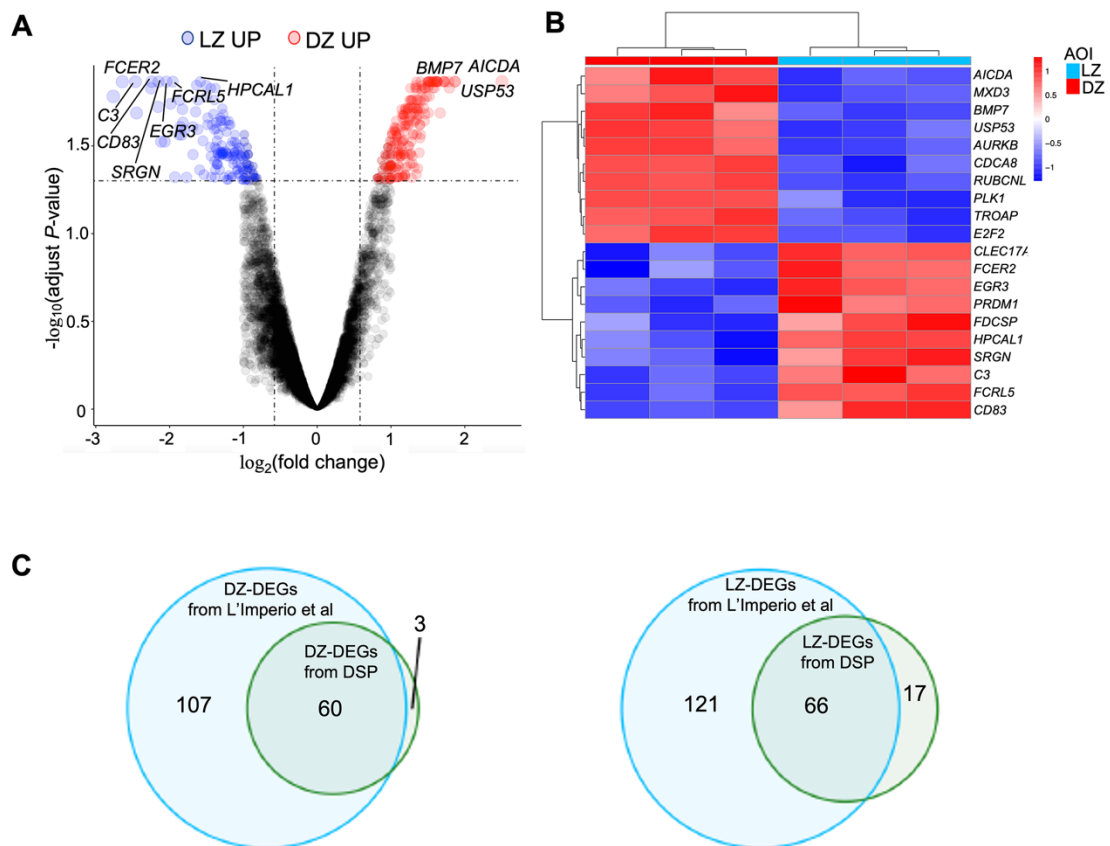

2

3 **Supplementary Fig. 4. Validation of gene expression patterns in the LZ and DZ**

4 **(A)** Volcano plot showing the DEGs of full regions (all cells, majority CD20+) between

5 LZ and DZ ( $n = 6$ ) based on adjusted  $P$  value  $< 0.05$  and  $|\log_2\text{FC}| \geq 0.58$ .  $P$  values were

6 determined by two tailed moderated  $t$ -test (BH corrected). **(B)** Top DEGs (10 DEGs

7 upregulated in LZ and 10 DEGs upregulated in DZ) based on adjusted  $P$  value are

8 displayed in the heatmap. **(C)** Venn diagram displaying the overlapping DEGs from

9 full regions of LZ and DZ between our DSP data and the previous publication from

10 L'Imperio. Differentially expressed genes, DEGs.

11

12

13

1 **Supplementary Fig. 5**

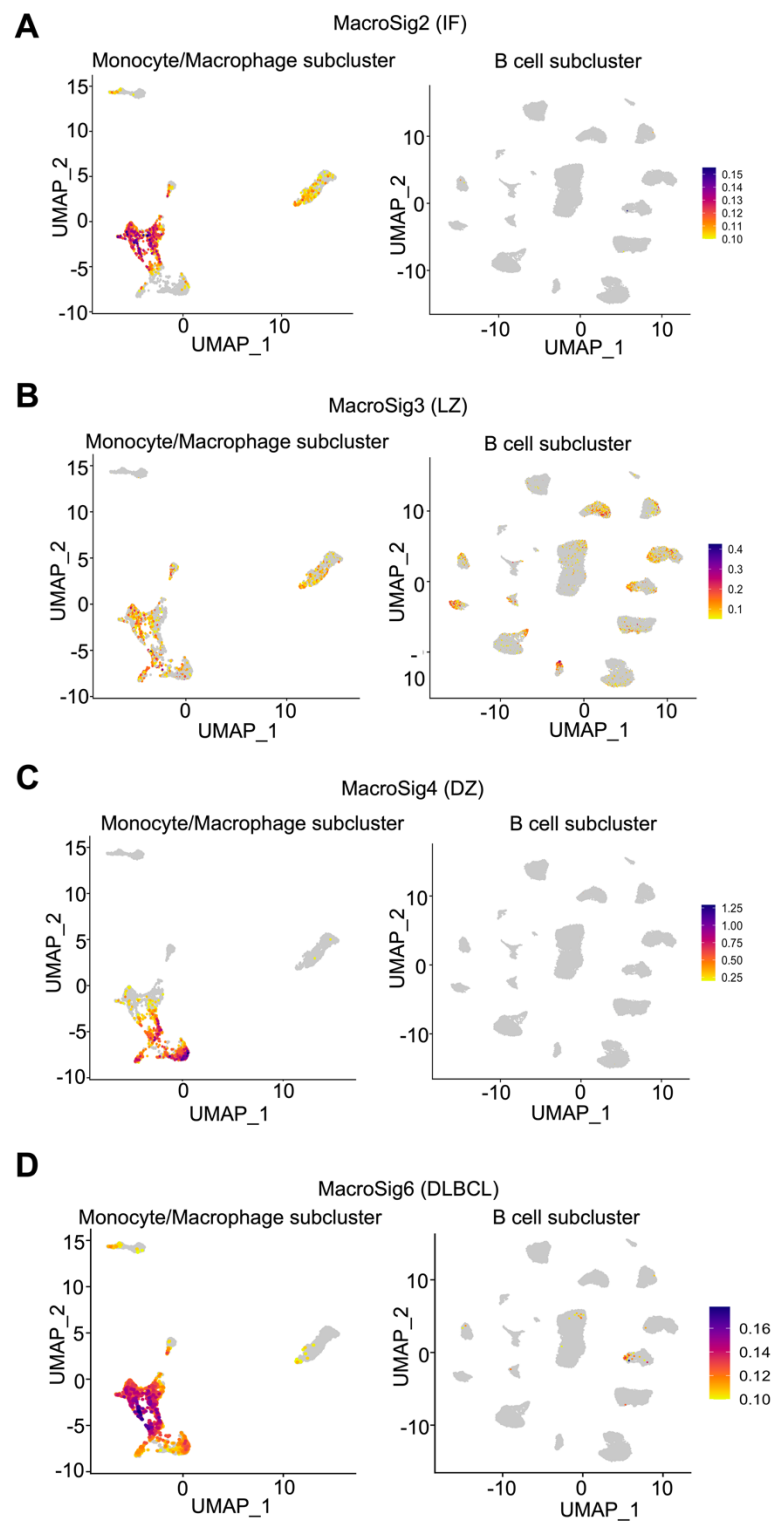

2

3

1 **Supplementary Fig. 5. Validating MacroSig2,3,4,6 using DLBCL scRNA-seq**  
2 **datasets. (A-D)** All genes of MacroSig2,3,4,6, through their respective module scores,  
3 were projected onto the Monocyte/Macrophage and B cell subsets of DLBCL scRNA-  
4 seq datasets (Ye et al;  $n = 17$ ).

5

6

7

8

9

10

11

12

13

14

15

16

17

18

1 **Supplementary Fig. 6**

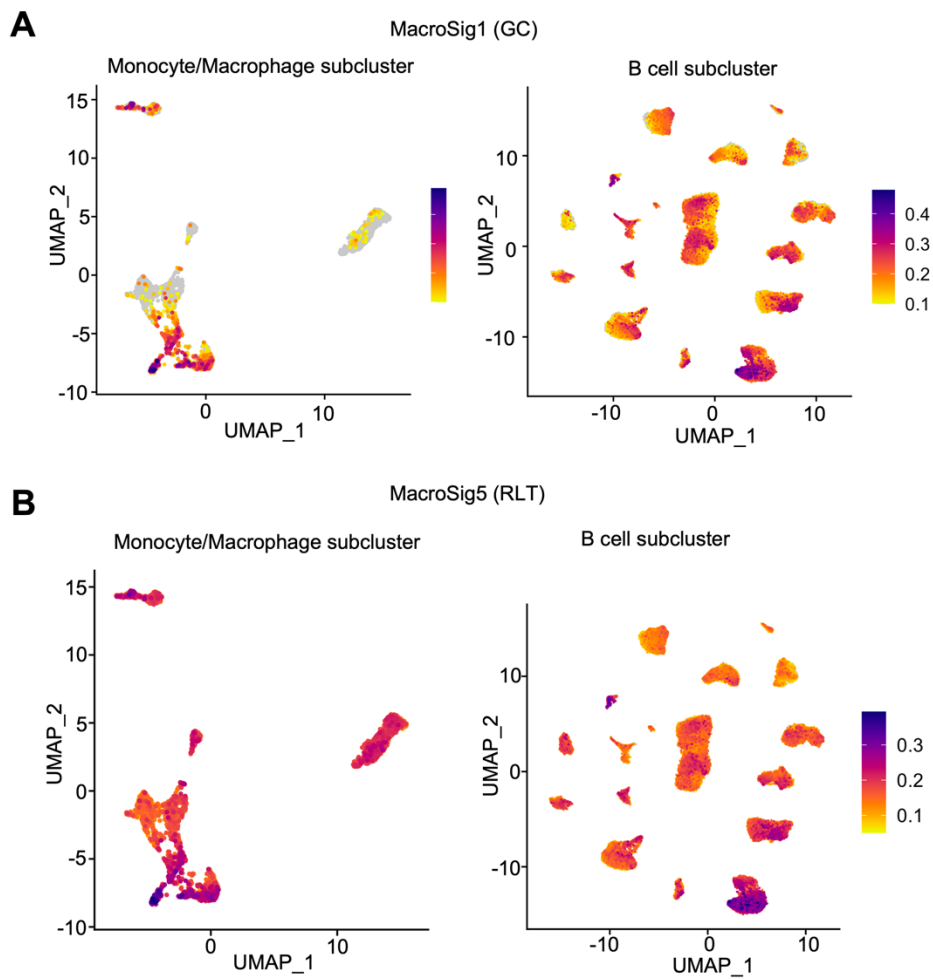

2

3 **Supplementary Fig. 6. Validating MacroSig1, 5 using DLBCL scRNA-seq**

4 **datasets. (A-B)** All genes of MacroSig1,5 through their respective module scores, were

5 projected onto the Monocyte/Macrophage and B cell subsets of DLBCL scRNA-seq

6 datasets (Ye et al;  $n = 17$ ).

7

8

9

1 **Supplementary Fig. 7**

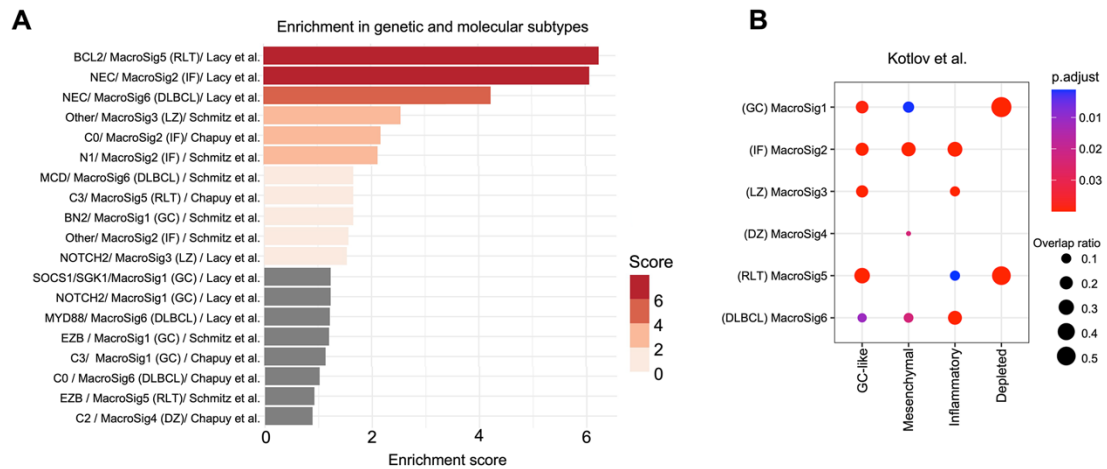

2

3 **Supplementary Fig. 7. The relationship of spatially-derived MacroSigs with**

4 **established genetic DLBCL subclassifications. (A)** Enrichment analysis of all

5 MacroSigs was performed on the genetic and molecular DLBCL subtypes across three

6 distinct bulk RNA gene expression profiles of Schmitz et al., Lacy et al., and Chapuy

7 et al. as mentioned in the Methods. The genetic subtypes association analysis is

8 presented as an integrated bar graph, where the strength of association between

9 MacroSigs and genetic subtypes is represented by an enrichment score calculated by: -

10  $\log_{10}$  (adjusted Fisher *P* value) **(B)** Enrichment gene set analysis of all MacroSigs was

11 performed on DLBCL microenvironment categories generated by Kotlov et al. Count

12 refers to the number genes present in the overlap between the MacroSigs and DLBCL

13 microenvironment categories. The overlap ratios were obtained by dividing the count

14 by the total number of genes in that respective DLBCL microenvironment categories.

15 *P* value generated by Fisher exact test (BH corrected). Not elsewhere classified, NEC.

16

1 **Supplementary Fig. 8**

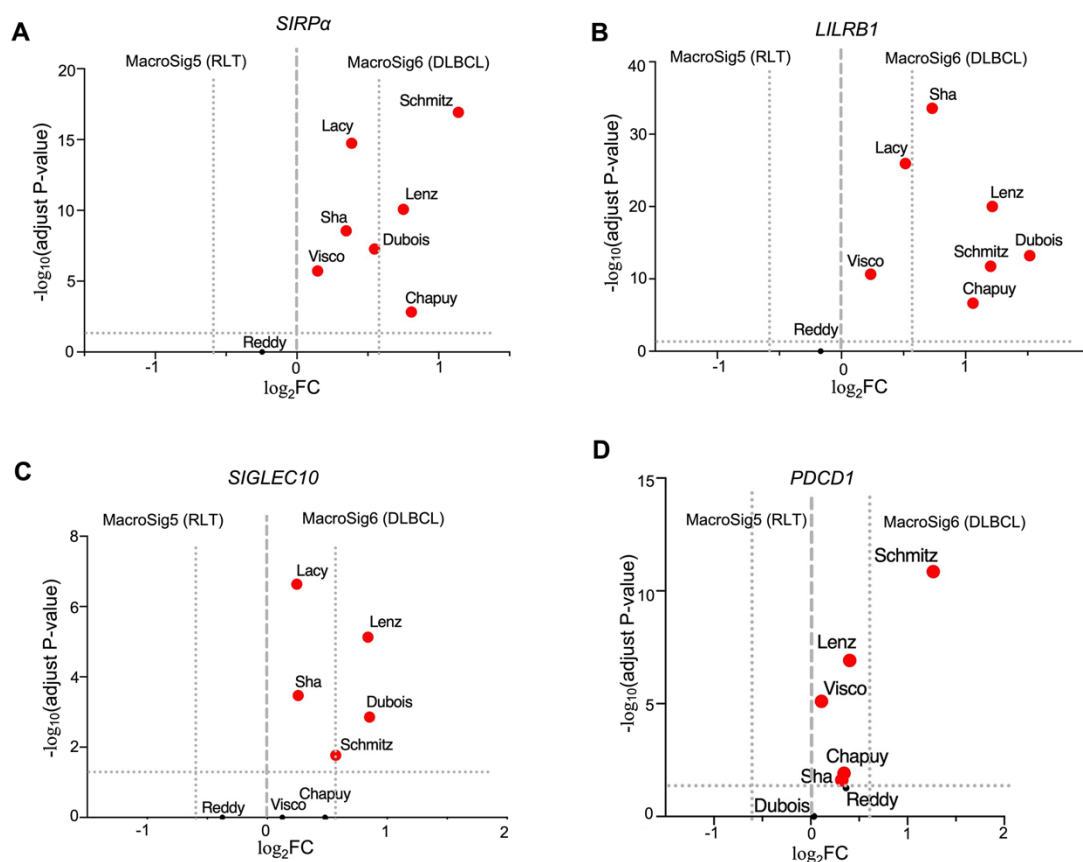

2

3 **Supplementary Fig. 8. Macrophage checkpoints are enriched in patients**  
 4 **categorized to have MacroSig 6 (DLBCL) in comparison to MacroSig 5 (RLT).**

5 **(A-D)** Using eight DLBCL publicly available datasets ( $n = 4, 594$ ; Lenz et al, Visco et  
 6 al, Dubois et al, Reddy et al, Chapuy et al, Reddy et al, Sha et al, and Lacy et al), patients  
 7 were divided into high and low groups based on the expression levels of MacroSig5/6  
 8 in each dataset (see Methods: Survival Analysis for details on patient stratification).

9 Differential expression analyses were performed to evaluate the average expression of  
 10 macrophage phagocytosis checkpoints (*SIRPa*, *LILRB1*, *SIGLEC10*, and *PDCD1*)  
 11 between two groups using the Wilcoxon test.  $P$  values were adjusted using the  
 12 Bonferroni correction. *PDCD1* was not present in Lacy dataset.

13



# 1 Supplementary Fig. 9

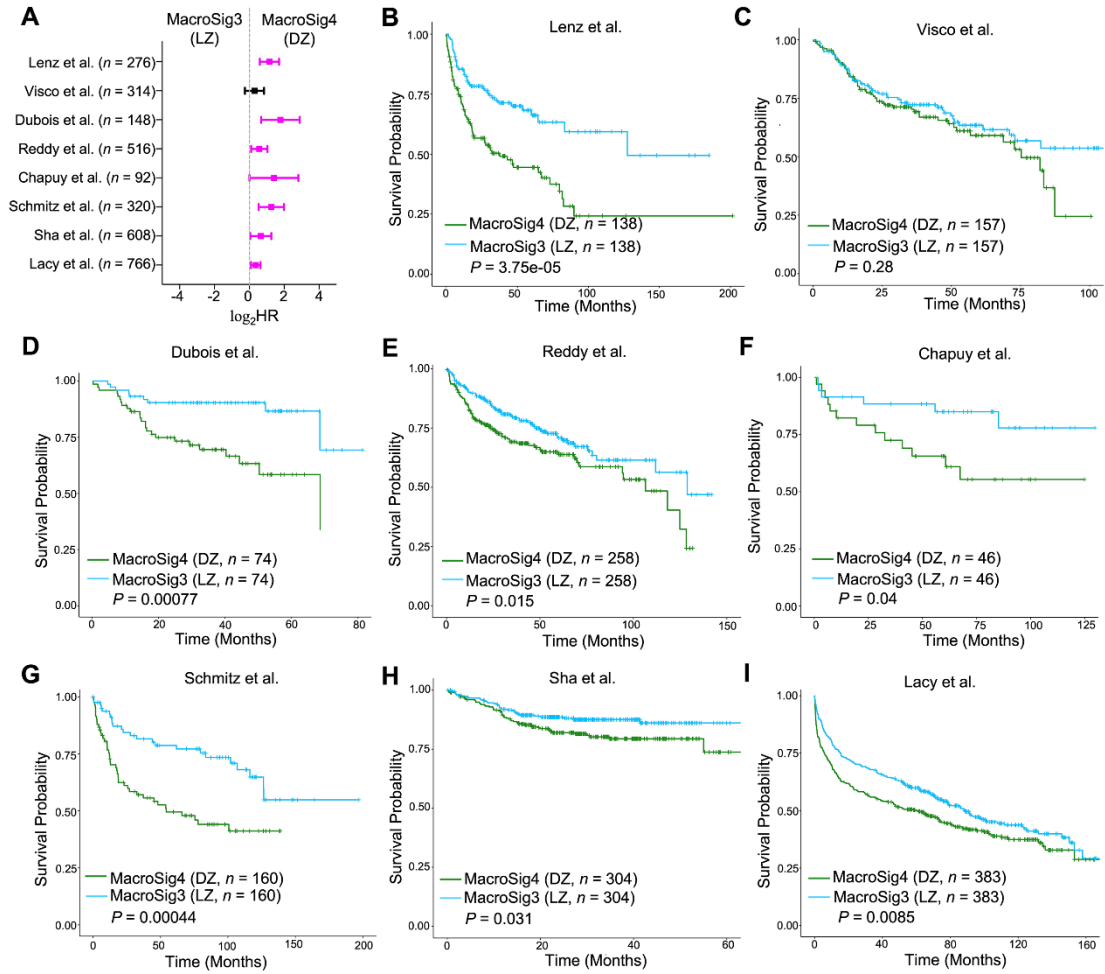

2

3

4

5

6

7

8

9

1 **Supplementary Fig. 9. Spatially-derived MacroSig3/4 (LZ/DZ) after filtering**  
2 **transcripts potentially linked to close interactions between macrophages and T**  
3 **cells, obtained analogous results in terms of prognostic ability. (A)** Forest plot  
4 depicting the univariate Cox proportional hazards model analysis, comparing  
5 MacroSig3 (LZ) and MacroSig4 (DZ) after filtering transcripts potentially linked to  
6 close interactions between macrophages and T cells (represented as tertile groups, as  
7 described in Methods: Survival analysis). Analysis was applied to bulk RNA gene  
8 expression profiles of DLBCL patients across eight publicly available transcriptomic  
9 datasets ( $n = 4,594$ , 8 datasets). Data are presented as the 95% confidence interval of  
10 the hazard ratio (plotted in log-scale). Source data are provided as a Source Data file.  
11 **(B-I)** Kaplan–Meier analyses showed that patients with high expression of MacroSig4  
12 (DZ) and low expression of MacroSig3 (LZ) after filtering transcripts potentially linked  
13 to close interactions between macrophages and T cells were still associated with poor  
14 OS in DLBCL patients across seven distinct DLBCL datasets.  $P$  values generated by  
15 log-rank test.

16  
17  
18  
19  
20  
21  
22

1 **Supplementary Fig. 10**

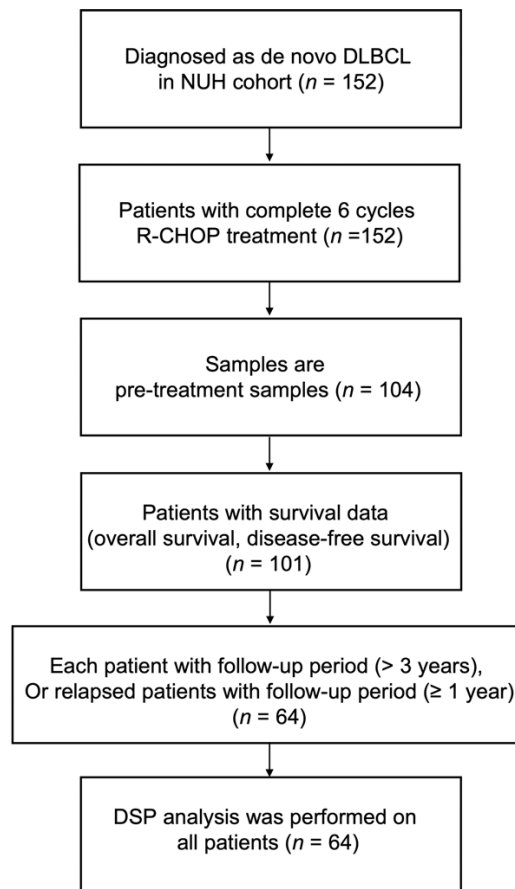

2

3 **Supplementary Fig. 10. Patients' selection flowchart.** Cases of de novo DLBCL  
4 diagnosed between 2010 and 2017 at the National University Hospital Singapore were  
5 included in this study. The criteria for selecting patients for DSP analysis is shown.

6

7

8

9

10

11

12

1 **Supplementary Fig. 11**

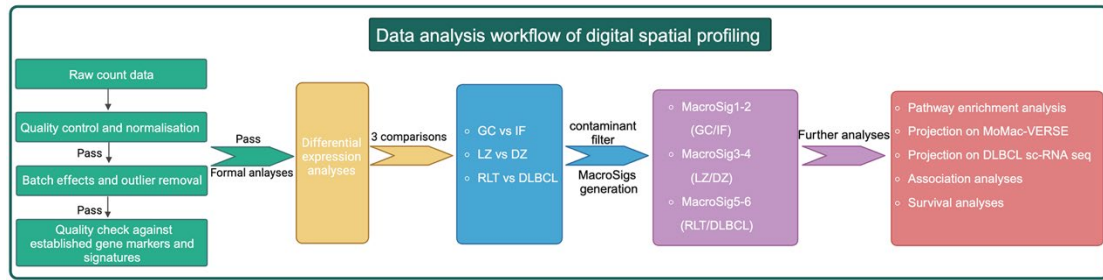

2

3 **Supplementary Fig. 11. The analysis workflow of DSP data.** Raw count data was  
4 subjected to quality checks and validations before undergoing formal differential  
5 expression analyses. Six MacroSigs were eventually generated through DEG  
6 comparisons between GC/IF, LZ/DZ and RLT/DLBCL. The MacroSigs were then used  
7 for further analyses such as macrophage subtype identification, pathway  
8 enrichment/association analyses, and survival analyses (created with BioRender.com).

9

10

11

12

13

14

15

16

17

18

1 **Supplementary Tables**

2 **Supplementary Table 1**

Supplementary Table 1. Gene signature characteristics of Macrophages, T cells, and B cells

| Macrophages | T cells | B cells |
|-------------|---------|---------|
| CD68        | CD3D    | MS4A1   |
| CD163       | CD3E    | CD79A   |
| FCGR1A      | UBASH3A | CD79B   |
| CSF1R       | CD2     | CD19    |
|             | TRBC2   | PAX5    |

3

4

5

6

7

8

9

10

11

12

13

14

15

16

17

18

19

# 1 Supplementary Table 2

Supplementary Table 2. HR and 95% CI of overall survival in DLBCL patients after 6 cycles of R-CHOP

| Groups                                   | Datasets                         | HR        | 95% CI    | <i>P</i> value |
|------------------------------------------|----------------------------------|-----------|-----------|----------------|
| MacroSig6 (DLBCL) versus MacroSig5 (RLT) | Lenz et al. ( <i>n</i> = 420)    | 2.5       | 1.68-3.71 | 5.6e-06        |
|                                          | Visco et al. ( <i>n</i> = 498)   | 1.66      | 1.13-2.44 | 0.00968        |
|                                          | Dubois et al. ( <i>n</i> = 223)  | 2.96      | 1.31-6.69 | 0.00903        |
|                                          | Reddy et al. ( <i>n</i> = 773)   | 1.42      | 1.03-1.95 | 0.0345         |
|                                          | Chapuy et al. ( <i>n</i> = 137)  | 1.35      | 0.49-3.72 | 0.565          |
|                                          | Schmitz et al. ( <i>n</i> = 481) | 1.82      | 1.09-3.01 | 0.0210         |
|                                          | Sha et al. ( <i>n</i> = 913)     | 1.07      | 0.72-1.57 | 0.7406         |
| MacroSig4 (DZ) versus MacroSig4 (LZ)     | Lacy et al. ( <i>n</i> = 1,149)  | 1.29      | 1.06-1.57 | 0.00968        |
|                                          | Lenz et al. ( <i>n</i> = 420)    | 3.25      | 2.16-4.9  | 1.4e-08        |
|                                          | Visco et al. ( <i>n</i> = 498)   | 1.39      | 0.96-2    | 0.0792         |
|                                          | Dubois et al. ( <i>n</i> = 223)  | 4.3       | 1.86-9.95 | 0.000662       |
|                                          | Reddy et al. ( <i>n</i> = 773)   | 1.81      | 1.32-2.47 | 0.000201       |
|                                          | Chapuy et al. ( <i>n</i> = 137)  | 3.39      | 1.41-8.15 | 0.00631        |
|                                          | Schmitz et al. ( <i>n</i> = 481) | 1.84      | 1.12-3.02 | 0.0161         |
| Sha et al. ( <i>n</i> = 913)             | 2.36                             | 1.56-3.59 | 5.3e-05   |                |
|                                          | Lacy et al. ( <i>n</i> = 1,149)  | 1.79      | 1.48-2.17 | 2.2e-06        |

Cox proportional hazards model and the Kaplan-Meier method were used for analysis. Before fitting the Cox model and conducting the log-rank test, the cox.ph test was used to test the proportional hazard assumption. *P* values were determined by two tailed. Diffuse large B-cell lymphoma, DLBCL; rituximab with cyclophosphamide, doxorubicin, vincristine, and prednisolone (R-CHOP); macrophage signatures, MacroSigs; reactive lymphoid tissue, RLT; confidence interval, CI; light zone, LZ; dark zone, DZ.

2

3

4

5

6

7

8

9

10

11

12

13

14

# 1 Supplementary Table 3

Supplementary Table 3. Multivariate analysis of MacroSig4 (DZ) adjusted for IPI scores and DHL\*

| Dataset                   | Groups                               | Adjust factors                                | OS   |           |         |
|---------------------------|--------------------------------------|-----------------------------------------------|------|-----------|---------|
|                           |                                      |                                               | HR   | 95% CI    | P value |
| Dubois ( <i>n</i> = 223)  | MacroSig4 (DZ) versus MacroSig4 (LZ) | IPI                                           | 3.48 | 1.49-8.12 | 0.0039  |
| Reddy ( <i>n</i> = 773)   | MacroSig4 (DZ) versus MacroSig4 (LZ) | IPI and DHL (negative, positive)              | 2    | 1.1-3.64  | 0.023   |
| Chapuy ( <i>n</i> = 137)  | MacroSig4 (DZ) versus MacroSig4 (LZ) | IPI                                           | 2.65 | 1.08-6.51 | 0.034   |
| Schmitz ( <i>n</i> = 481) | MacroSig4 (DZ) versus MacroSig4 (LZ) | IPI                                           | 1.52 | 0.85-2.72 | 0.16    |
| Sha ( <i>n</i> = 913)     | MacroSig4 (DZ) versus MacroSig4 (LZ) | IPI, DHL (double-hit, MYC-normal, single-hit) | 2.38 | 1.23-4.61 | 0.01    |
| Lacy ( <i>n</i> = 1149)   | MacroSig4 (DZ) versus MacroSig4 (LZ) | IPI                                           | 1.58 | 1.23-2.04 | 0.0004  |

\*The IPI scores of Lenz et al. and Visco et al. were not available. The DHL is only available in Reddy et al. and Sha et al. Cox proportional hazards model and the Kapan-Meier method were used for analysis. Before fitting the Cox model and conducting the log-rank test, the cox.ph test was used to test the proportional hazard assumption. *P* values were determined by two tailed. Dark zone, DZ; international prognostic index, IPI; double hit lymphoma, DHL; overall survival, OS; hazard ratio, HR; confidence interval, CI.

2

3

4

5

6

7

8

9

10

11

12

13

14

15

16

17

# 1 Supplementary Table 4

Supplementary Table 4. The gene lists of MacroSig3-4 (LZ/DZ) after filtering transcripts potentially linked to close interactions between macrophages and T cells  
DZ vs LZ

| MacroSig3 (LZ) |          |                     |                         | MacroSig4 (DZ) |          |                     |                         |
|----------------|----------|---------------------|-------------------------|----------------|----------|---------------------|-------------------------|
| Ranking        | Gene     | Log <sub>2</sub> FC | Adjusted <i>P</i> value | Ranking        | Gene     | Log <sub>2</sub> FC | Adjusted <i>P</i> value |
| 1              | CXCL13   | 2.31                | 8.1E-15                 | 1              | C1QA     | 2.02                | 7.4E-13                 |
| 2              | CLU      | 1.24                | 3.3E-12                 | 2              | CD163L1  | 1.68                | 1.7E-12                 |
| 3              | CHI3L1   | 1.51                | 0.00000011              | 3              | C1QC     | 2.01                | 1E-10                   |
| 4              | CSTA     | 0.69                | 0.00000021              | 4              | A2M      | 1.21                | 6.7E-10                 |
| 5              | CDC42EP4 | 0.92                | 0.00000043              | 5              | C1QB     | 1.39                | 1.1E-09                 |
| 6              | ZBED6CL  | 0.82                | 0.00000081              | 6              | SLC40A1  | 1.18                | 1.2E-09                 |
| 7              | PLEK     | 0.59                | 0.000035                | 7              | LIPA     | 1.12                | 0.00000023              |
| 8              | CHIT1    | 1.14                | 0.000035                | 8              | CD163    | 1.4                 | 0.00000067              |
| 9              | TNFRSF9  | 0.7                 | 0.000056                | 9              | LGGM     | 1.48                | 0.00000017              |
| 10             | MYC      | 0.69                | 0.00014                 | 10             | C3AR1    | 0.77                | 0.0000011               |
| 11             | FPR1     | 0.71                | 0.00036                 | 11             | MS4A6A   | 0.82                | 0.0000011               |
| 12             | ALPK2    | 0.66                | 0.00042                 | 12             | CTSB     | 0.85                | 0.0000011               |
| 13             | SOCS3    | 0.76                | 0.00063                 | 13             | PDK4     | 1.11                | 0.0000022               |
| 14             | DSP      | 0.81                | 0.00072                 | 14             | CCL18    | 1.22                | 0.0000034               |
| 15             | NDRG1    | 0.71                | 0.00077                 | 15             | SDC3     | 0.84                | 0.000011                |
| 16             | CHRNA1   | 0.64                | 0.001                   | 16             | IL18BP   | 0.89                | 0.000016                |
| 17             | CYP27B1  | 0.84                | 0.0018                  | 17             | MPEG1    | 0.96                | 0.000018                |
| 18             | HAMP     | 0.68                | 0.0021                  | 18             | CTSZ     | 0.67                | 0.000028                |
| 19             | RAB13    | 0.61                | 0.0023                  | 19             | FCGRT    | 0.89                | 0.000036                |
| 20             | NFKBIA   | 0.61                | 0.0038                  | 20             | PLA2G15  | 0.85                | 0.000041                |
| 21             | GFPT2    | 0.68                | 0.0044                  | 21             | ABCA1    | 0.76                | 0.00012                 |
| 22             | DERL3    | 0.62                | 0.0057                  | 22             | PLD3     | 0.72                | 0.00013                 |
| 23             | GJA1     | 0.67                | 0.006                   | 23             | CFD      | 0.6                 | 0.00014                 |
| 24             | IGHG2    | 0.71                | 0.007                   | 24             | ADORA3   | 0.72                | 0.00021                 |
| 25             | IGHG3    | 0.76                | 0.0084                  | 25             | SLC18B1  | 0.79                | 0.00032                 |
| 26             | TMEM178B | 0.59                | 0.01                    | 26             | BCR      | 0.64                | 0.00035                 |
| 27             | IGHG1    | 0.78                | 0.013                   | 27             | FPR3     | 0.72                | 0.00043                 |
| 28             | JCHAIN   | 0.8                 | 0.017                   | 28             | SELENOP  | 0.88                | 0.00054                 |
| 29             | VPS37B   | 0.66                | 0.017                   | 29             | ADAP2    | 0.67                | 0.00098                 |
| 30             | LGI2     | 0.62                | 0.02                    | 30             | RNASE6   | 0.66                | 0.001                   |
| 31             | NRG2     | 0.63                | 0.044                   | 31             | SLC35E3  | 0.71                | 0.0011                  |
|                |          |                     |                         | 32             | FOXP1    | 0.59                | 0.0012                  |
|                |          |                     |                         | 33             | CST3     | 0.65                | 0.0013                  |
|                |          |                     |                         | 34             | CD209    | 0.87                | 0.0016                  |
|                |          |                     |                         | 35             | PECAM1   | 0.62                | 0.002                   |
|                |          |                     |                         | 36             | PYGL     | 0.69                | 0.0021                  |
|                |          |                     |                         | 37             | CD300A   | 0.64                | 0.0022                  |
|                |          |                     |                         | 38             | COL6A1   | 0.63                | 0.0032                  |
|                |          |                     |                         | 39             | SLC37A2  | 0.64                | 0.0036                  |
|                |          |                     |                         | 40             | PLTP     | 0.6                 | 0.0038                  |
|                |          |                     |                         | 41             | MCOLN1   | 0.62                | 0.004                   |
|                |          |                     |                         | 42             | HPSE     | 0.77                | 0.005                   |
|                |          |                     |                         | 43             | SLC7A8   | 0.77                | 0.006                   |
|                |          |                     |                         | 44             | DHRS3    | 0.61                | 0.0064                  |
|                |          |                     |                         | 45             | CCR1     | 0.58                | 0.0091                  |
|                |          |                     |                         | 46             | COLEC12  | 0.58                | 0.0095                  |
|                |          |                     |                         | 47             | LYZ      | 0.66                | 0.012                   |
|                |          |                     |                         | 48             | MS4A4A   | 0.74                | 0.012                   |
|                |          |                     |                         | 49             | IGFBP5   | 0.8                 | 0.012                   |
|                |          |                     |                         | 50             | ITM2B    | 0.65                | 0.014                   |
|                |          |                     |                         | 51             | BLVRB    | 0.59                | 0.014                   |
|                |          |                     |                         | 52             | NRP1     | 0.63                | 0.016                   |
|                |          |                     |                         | 53             | ATP6V0D2 | 0.74                | 0.017                   |
|                |          |                     |                         | 54             | BGN      | 0.67                | 0.018                   |
|                |          |                     |                         | 55             | CASS4    | 0.62                | 0.022                   |
|                |          |                     |                         | 56             | PILRA    | 0.59                | 0.032                   |
|                |          |                     |                         | 57             | MMP12    | 0.78                | 0.033                   |
|                |          |                     |                         | 58             | MAMDC2   | 0.61                | 0.037                   |

Differential expressed genes, DEGs; light zone, LZ; dark zone, DZ; fold change, FC. *P* values were determined by two tailed moderated *t*-test (BH corrected). Genes ranked by *P* value.

2

3

4



1 **Supplementary Table 5**

Supplementary Table 5. The clinicopathologic characteristics in DLBCL patients from NUH cohort

| Variables           | N  | Percentage |
|---------------------|----|------------|
| Age                 |    |            |
| ≤60y                | 26 | 40.6%      |
| >60y                | 38 | 59.4%      |
| Sex                 |    |            |
| Male                | 42 | 65.6%      |
| Female              | 22 | 34.4%      |
| Cell of origin      |    |            |
| Non-GCB             | 32 | 50.0%      |
| GCB                 | 31 | 48.4%      |
| Undetermined        | 1  | 1.6%       |
| IPI                 |    |            |
| Low                 | 32 | 50.00%     |
| Low-intermediate    | 11 | 17.2%      |
| High-intermediate   | 7  | 10.9%      |
| High                | 12 | 18.8%      |
| Undetermined        | 2  | 3.1%       |
| Double-hit lymphoma |    |            |
| Yes                 | 2  | 3.1%       |
| No                  | 49 | 76.6%      |
| Undetermined        | 13 | 20.3%      |
| Biopsies            |    |            |
| Lymph node          | 26 | 40.6%      |
| Extra-nodal         | 29 | 45.3%      |
| Undetermined        | 9  | 14.1%      |
| Relapse status      |    |            |
| Non-relapse         | 41 | 64.1%      |
| Relapse             | 20 | 31.2%      |
| Unclassified        | 3  | 4.7%       |

international prognostic index, IPI; germinal center B-cell like, GCB.

2  
3  
4  
5  
6  
7  
8  
9

1 **Supplementary References**

- 2 1. Ye, X., et al. A single-cell atlas of diffuse large B cell lymphoma. *Cell Rep.* **39**,  
3 110713 (2022).

4

5

6
