# Supplementary material for: Spatially-resolved transcriptomics reveal macrophage heterogeneity and prognostic significance in diffuse large B-cell lymphoma
Source: PubMed Central journal article supplement (PMC10923916; doi:10.1038/s41467-024-46220-z), 2024-03-08
Supplement: 41467_2024_46220_MOESM3_ESM.pdf [file 41467_2024_46220_MOESM3_ESM.pdf]

## **Description of Additional Supplementary Files**

### **Supplementary Data Legends**

**Supplementary Data 1.** The DEGs of the comparison between LZ and DZ

**Supplementary Data 2.** The gene lists of all MacroSigs with corresponding log<sub>2</sub>FC and adjusted P value

**Supplementary Data 3.** The DEGs of B cells between LZ and DZ

**Supplementary Data 4.** The cell numbers and AOI size in each region before quality control
